# Supplementary material
Source: PubMed Central journal article supplement (PMC6233849)
Supplement: jama-320-1338-s002.pdf [file jama-320-1338-s002.pdf]

## Supplementary Online Content

Howard G, Cushman M, Moy CS, et al. Association of Clinical and Social Factors With Excess Hypertension Risk in Black Compared With White US Adults. *JAMA*. doi:10.1001/jama.2018.13467

Data Sharing Statement

This supplementary material has been provided by the authors to give readers additional information about their work.

## Data Sharing Statement

### **Data**

**Data available:** Yes

**Data types:** Deidentified participant data, Data dictionary

**How to access data:** Data are available through a data use agreement. Contact Ms. Margaret Stewart (megstewart@uab.edu)

**When available:** With publication

### **Supporting Documents**

**Document types:** None

### **Additional Information**

**Who can access the data:** Data are provided to those where the use of the data has been approved and where a data use agreement is in place. Alternatively, the study will support the analysis at the study coordinating center for approved manuscripts led by scientific investigators not directly affiliated with the study.

**Types of analyses:** The study welcomes investigators to use the data for scientific purposes leading to publication (over 75% of papers from the study are first authored by individuals not directly part of the parent study grant).

**Mechanisms of data availability:** The data are made available for those with approved proposal and signed data use agreement.
